# Supplementary material for: Clinical measurement of cellular DNA damage hypersensitivity in patients with DNA repair defects
Source: Springer Nature journal article supplement (doi:10.1186/s13023-022-02199-8), 2022-02-14
Supplement: MOESM1 [file 20131206]

Supplementary Table 1. Patients included in the study

| <b>Pat ID/gene variant</b> | <b>Diagnosis</b> | <b>Variant description</b>                                                   | <b>Phenotype</b>                                                                                                                                  |
|----------------------------|------------------|------------------------------------------------------------------------------|---------------------------------------------------------------------------------------------------------------------------------------------------|
| <i>PRKDC</i> var 1         | CID              | compound heterozygous variants (an in frame deletion and a missense variant) | Mild combined immunodeficiency presenting with, IgA deficiency, recurrent infections, vitiligo and atypical intestinal disease resembling celiac. |
| <i>PRKDC</i> var 2         | CID              |                                                                              |                                                                                                                                                   |
| <i>DCLRE1C</i> var 1       | SCID             | compound heterozygous variants (a large deletion and a missense variant)     | Immunodeficiency, no B cells, recurrent respiratory tract infections and emphysema/bronchiectasis                                                 |
| <i>DCLRE1C</i> var 2       | SCID             |                                                                              |                                                                                                                                                   |
| <i>NBN</i> var             | NBS              | homozygous truncating variant                                                | Microcephaly, growth retardation and developmental delay. An immunological defect affecting mainly the T cells, and recurrent infections.         |
| <i>MSH6</i> var            | CMMRD            | compound heterozygous truncating variants                                    | Atypical neurofibromatosis and multiple intracerebral abnormalities as well as multiple polyps and adenomas in the colon.                         |
| Abbreviations:             | CID              | Combined immunodeficiency                                                    |                                                                                                                                                   |
|                            | SCID             | Severe combined immunodeficiency                                             |                                                                                                                                                   |
|                            | NBS              | Nijmegen breakage syndrome                                                   |                                                                                                                                                   |
|                            | CMMRD            | Constitutional Mismatch Repair Deficiency Syndrome                           |                                                                                                                                                   |



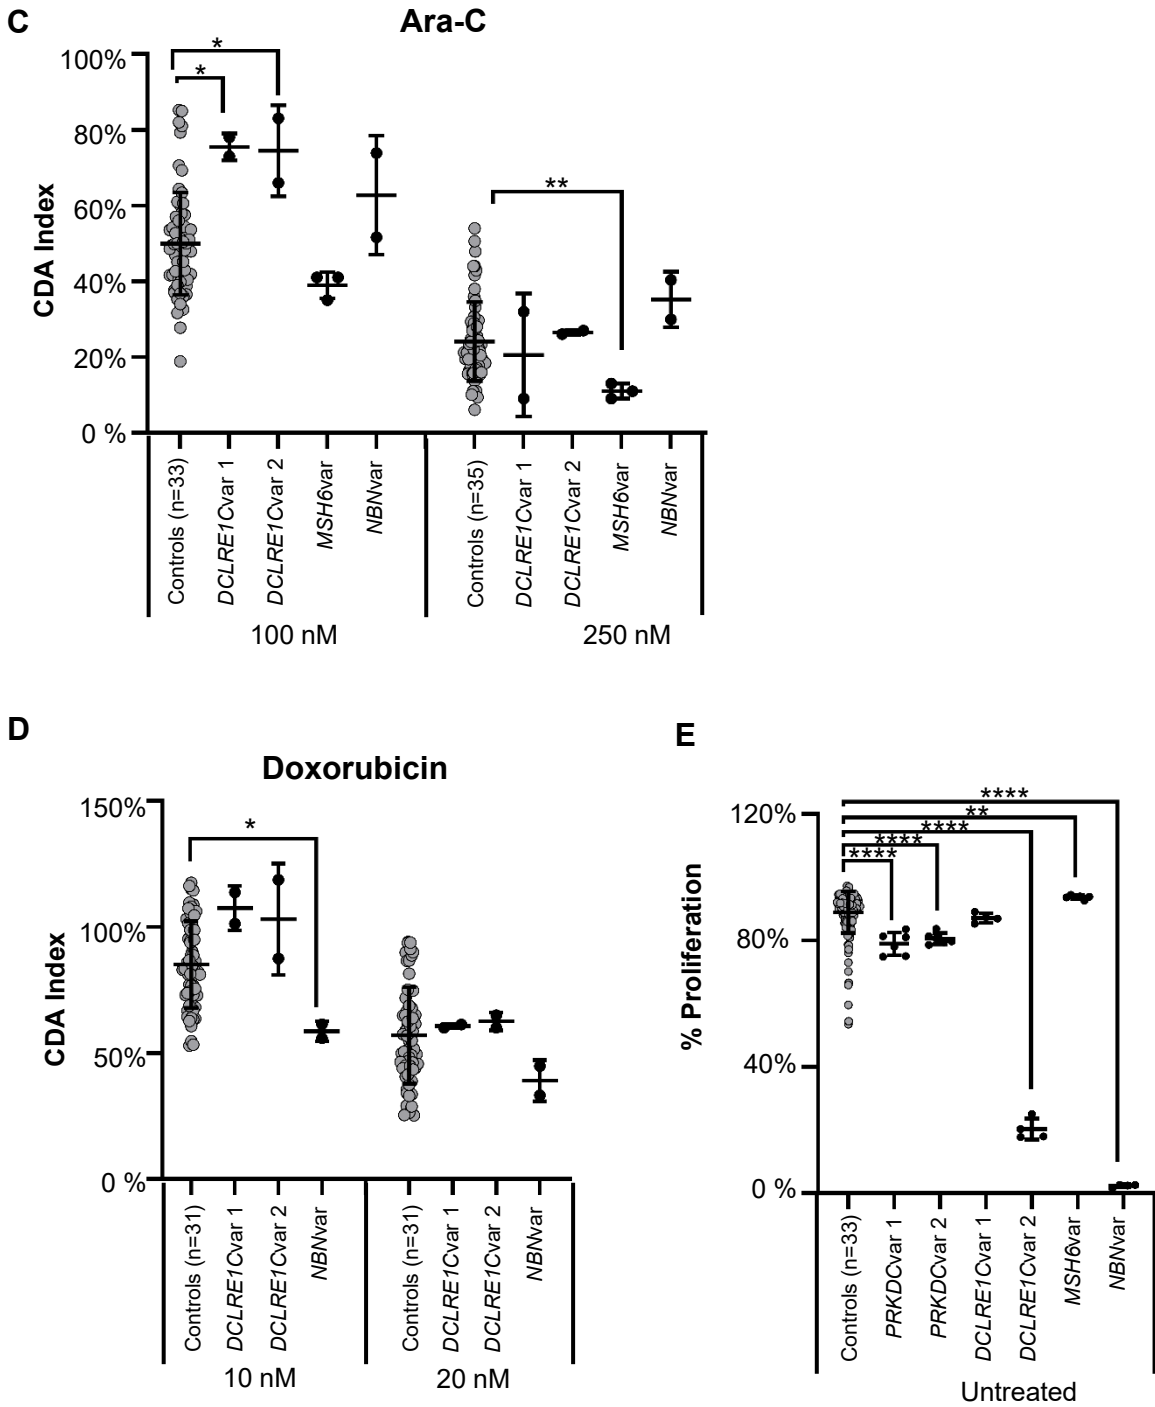

**Supplementary Figure 1.** *In vitro* sensitivity of blood T cells from patients compared to healthy controls using the CDA treated with indicated doses of; **A.** IR, **B.** MMC, **C.** Ara-C, and **D.** Doxorubicin. **E.** The proliferation rate of untreated T cells for each patient and 33 control individuals. Patient proliferation was assayed as four to six replicates. The number of controls is indicated for each dose and ranged from 18 to 75 years old. The line and error bars indicate the mean and standard deviation of the mean. Distribution of controls was not normal, and the patients were compared to the controls using the nonparametric two-tailed Mann-Whitney test.
